# Supplementary material for: Cathodized copper porphyrin metal–organic framework nanosheets for selective formate and acetate production from CO2 electroreduction
Source: Royal Society of Chemistry journal article supplement (doi:10.1039/c8sc04344b), 2018-12-14
Supplement: c8sc04344b1.pdf [file c8sc04344b1.pdf]

## Electronic Supplementary Information

### **Cathodized Copper Porphyrin Metal-Organic Frameworks Nanosheets for Selective Formate and Acetate Production from CO<sub>2</sub> Electroreduction**

Jian-Xiang Wu, Shu-Zhen Hou, Xiang-Da Zhang, Ming Xu, Hua-Fei Yang, Pei-Sheng  
Cao and Zhi-Yuan Gu\*

Jiangsu Key Laboratory of Biofunctional Materials, Jiangsu Collaborative Innovation  
Center of Biomedical Functional Materials, Jiangsu Key Laboratory of New Power  
Batteries, School of Chemistry and Materials Science, Nanjing Normal University,  
Nanjing, 210023, P. R. China

Email: [guzhiyuan@njnu.edu.cn](mailto:guzhiyuan@njnu.edu.cn), Fax/Phone: +86-25-85891952

# Contents

|                                                                                       |           |
|---------------------------------------------------------------------------------------|-----------|
| <b>Section S1. Chemicals</b>                                                          | <b>3</b>  |
| <b>Section S2. Synthesis of Materials</b>                                             | <b>4</b>  |
| <b>Section S3. Materials Characterization</b>                                         | <b>7</b>  |
| <b>Section S4. Electrochemical Study</b>                                              | <b>8</b>  |
| <b>Section S5. Product Analysis</b>                                                   | <b>10</b> |
| <b>Section S6. Calculation of Turnover Frequency</b>                                  | <b>11</b> |
| <b>Section S7. Electrochemical CO<sub>2</sub> Reduction by Cu<sub>2</sub>(CuTCPP)</b> | <b>13</b> |
| <b>Section S8. Characterization of Other Cu Catalysts</b>                             | <b>22</b> |
| <b>Section S9. Cathodized Reconstruction of Cu<sub>2</sub>(CuTCPP)</b>                | <b>27</b> |
| <b>Section S10. Standard Curve</b>                                                    | <b>36</b> |

## Section S1. Chemicals

The following chemicals were used as received without further purification: copper (II) nitrate trihydrate, polyvinylpyrrolidone (M=40000), L-Ascorbic acid, sodium hydroxide, propionic acid, methyl p-formylbenzoate, ester, tetrahydrofuran, methanol, ethanol, hydrochloric acid copper (II) chloride dehydrate, 1-methylimidazole, ethyl bromide and NaBF<sub>4</sub> were purchased from Aladdin. Nafion D-521 dispersion (5 wt% in lower aliphatic alcohols and water) and Nafion 117 proton exchange membrane were purchased from Shanghai Hesen Electric Co. Ltd.. Cu(NO<sub>3</sub>)<sub>2</sub>·3H<sub>2</sub>O, AgNO<sub>3</sub>, N,N-dimethylformamide (DMF) and acetonitrile (CH<sub>3</sub>CN) were purchased from Aladdin. Fluorinedoped tin oxide (FTO) glass substrates (8 Ω/sq) were purchased from Dalian Qiseguang Solar Technology Development Co. Ltd.. All materials were used as obtained without further purification. 5,10,15,20-tetrakis (4-carboxyphenyl) porphyrin (H<sub>2</sub>TCPP) and 1-Ethyl-3-methylimidazolium tetra-fluoroborate (EMIMBF<sub>4</sub>) were prepared according to the published procedures. The ultrapure water (18.4 MΩ·cm) was prepared by an ELGA purification system (Veolia Water Solutions & Technologies, UK).

## Section S2. Synthesis of Materials

### Preparation method of MOF nanosheet

Cu<sub>2</sub>(CuTCPP) nanosheets were synthesized by using a solution reaction of Cu(NO<sub>3</sub>)<sub>2</sub>·3H<sub>2</sub>O and H<sub>2</sub>TCPP in N,N-diethylformamide (DMF). Typically, H<sub>2</sub>TCPP (7.9 mg, 0.01 mmol), Cu(NO<sub>3</sub>)<sub>2</sub>·3H<sub>2</sub>O (7.3 mg, 0.03 mmol), DMF 18 mL, were mixed in flask at room temperature. The mixture was kept at 85 °C for 24 hours with stirring, and then, the solid was collected by centrifugation. After above processes, the purple nanosheets were obtained.<sup>1, 2</sup>

**5,10,15,20-tetrakis (4-carboxyphenyl) porphyrin (H<sub>2</sub>TCPP).** To propionic acid (100 mL) in a 500-mL three necked flask pyrrole (3.0g, 0.043 mol) and methyl p-formylbenzoate (6.9 g, 0.042 mol) were added and refluxed for 12h. After the reaction mixture was cooled to room temperature, crystals were collected by filtration to afford purple crystals (TPP-COOMe). The obtained ester (0.75 g) was stirred in THF (25 mL) and MeOH (25 mL) mixed solvent, to which a solution of KOH (2.63 g, 46.95 mmol) in H<sub>2</sub>O (25 mL) was introduced. This mixture was refluxed for 12 h. After cooling down to room temperature, the THF and MeOH were evaporated. Additional water was added to the resulting water phase and the mixture was heated until the solid was fully dissolved. Then the homogeneous solution was acidified with 1M HCl until no further precipitate was generated. The dark red was collected by filtration, washed with water and dried in vacuum overnight.<sup>3</sup>

**[5,10,15,20-tetrakis(4-carboxyphenyl)porphyrinato]-Cu(II) (TCPP(Cu)).** A solution of TPP-COOMe 0.854 g (1.0 mmol) and CuCl<sub>2</sub>·2H<sub>2</sub>O (2.2g, 12.8 mmol) in

100 mL of DMF was refluxed for 6 h. After the mixture was cooled to room temperature, 150 mL of H<sub>2</sub>O was added. The resultant precipitate was filtered and washed with 50 mL of H<sub>2</sub>O for two times. The obtained solid was dissolved in CHCl<sub>3</sub>, followed by three times of washing with water. The organic layer was dried over anhydrous magnesium sulfate and evaporated to afford dark red crystals. The obtained ester (0.75 g) was stirred in THF (25 mL) and MeOH (25 mL) mixed solvent, to which a solution of KOH (2.63 g, 46.95 mmol) in H<sub>2</sub>O (25 mL) was introduced. This mixture was refluxed for 12 h. After cooling down to room temperature, the THF and MeOH were evaporated. Additional water was added to the resulting water phase and the mixture was heated until the solid was fully dissolved. Then the homogeneous solution was acidified with 1M HCl until no further precipitate was generated. The dark red was collected by filtration, washed with water and dried in vacuum overnight.<sup>3</sup>

**1-Ethyl-3-methylimidazolium tetra-fluoroborate (EMIMBF<sub>4</sub>).** 1-methylimidazole and ethyl bromide with mole ratio of 1: 1.2 was reacted in a flask at 70°C for 12 h. The impurities of raw product were washed and extracted by ethyl acetate and three times. The yellowish viscous liquid (EMIMBr) product was obtained after rotary evaporation at 65 °C for 6 h. The mixture of EMIMBr and NaBF<sub>4</sub> was stirred at 40 °C for 12 h. After the reaction, dichloromethane was added to extract the product EMIMBF<sub>4</sub>. After the precipitated sodium bromide was separated by filtering the solution, the product EMIMBF<sub>4</sub> was obtained with rotary evaporation at 45 °C for 6 h

**Copper electrode fabrication.** FTO electrodes were dried after sequentially washing

with 1M HCl and ethanol. The pretreated FTO electrodes with dimensions of  $1 \times 1 \text{ cm}^2$  were used as cathodes in a three electrode cell consisting of an anode (platinum sheet auxiliary electrode) and an Ag/AgCl reference electrode. 30 g/L of copper acetate and 20 g/L of sodium acetate mixed as an electrolyte at ambient temperature to synthesis copper onto FTO at -1.2 V versus Ag/AgCl for 200 s. Then, the Cu-FTO electrodes were obtained after washing with ultrapure water and drying under ambient conditions.<sup>4</sup>

**Preparation of Cu<sub>2</sub>O.** 1 mL of CuCl<sub>2</sub> (0.1 M) and 0.1 g of PVP were dissolved into 40 mL of water. The solution was stirred for 5 min before the dropwise addition of 2.5 mL of NaOH (0.2 M). Then 2.5 mL of ascorbic acid (0.1 M) was dropwise added into the solution just 5 min after all NaOH was added. The mixture was continuously stirred for 5 min at room temperature, then the solid was recovered by centrifugation and washed with ethanol twice. At last, the Cu<sub>2</sub>O nanoparticles were resuspended into 10 mL of ethanol (copper concentration: ca. 10 mM) for future investigation.<sup>5</sup>

**Preparation of CuO.** 1 mL of CuCl<sub>2</sub> (0.1 M) and 0.1 g of PVP were dissolved into 40 mL of water. The solution was stirred for 5 min before the dropwise addition of 2.5 mL of NaOH (0.2 M). The mixture was continuously stirred for 5 min at room temperature, then the solid was recovered by centrifugation and washed with ethanol twicend and dried in vacuum overnight.<sup>5</sup>

### **Section S3. Materials Characterization**

X-ray diffraction (XRD) patterns were obtained from a Rigaku SmartLab 9 Kw instrument (Tokyo, Japan) D/MAX-2500 diffractometer with a Cu K $\alpha$  radiation (1.54056 Å). Data was recorded from 5° to 80°. The scanning electron microscope (SEM) images were collected on a JSM-7600 scanning electron microscope (JEOL Ltd.). Transmission electron microscopy (TEM) images were recorded on a JEOL JEM-2100F transmission electron microscope operated at an accelerating voltage of 200 kV. Atomic force microscopy (AFM) measurements were performed with a PicoPlus in tapping mode (Agilent, US). X-ray photoelectron spectroscopy (XPS) were ESCALAB 250XI-AES (Thermo Fisher Scientific) equipped with Al K $\alpha$  monochromator. Fourier transform infrared spectroscopy was obtained on Vertex 70 (Bruker, Germany).

#### Section S4. Electrochemical Study

To prepare the  $\text{Cu}_2(\text{CuTCPP})$  nanosheets electrode, 0.5 mg  $\text{Cu}_2(\text{CuTCPP})$  prepared above were suspended in 50  $\mu\text{L}$  ethanol with 20  $\mu\text{L}$  Nafion D-521 dispersion (5 wt%) to form a homogeneous ink assisted by ultrasound. Then, 110  $\mu\text{L}$  of the ink was spread onto the FTO ( $1 \times 1 \text{ cm}^2$ ) surface by a micropipette and then dried under room temperature. The loading of  $\text{Cu}_2(\text{CuTCPP})$  catalyst was  $0.5 \text{ mg/cm}^2$ . Before experiment, all the auxiliary electrodes were sonicated in acetone for 10 min and then washed with water and ethanol, followed by drying. The electrochemical workstation (CHI 660E, Shanghai CH Instruments Co., China) was used in all the experiments of  $\text{CO}_2$  reduction. Cyclic voltammetry (CV) and linear sweep voltammetry (LSV) measurements were carried out in a H-type cell with three-electrode configuration, which consisted of working electrode ( $\text{Cu}_2(\text{CuTCPP})$  electrode), a platinum sheet auxiliary electrode, and an  $\text{Ag}/\text{Ag}^+$  (0.01 M  $\text{AgNO}_3$  in 0.1 M EMIMBF<sub>4</sub>-MeCN) reference electrode. The electrolyte was bubbled with  $\text{N}_2$  or  $\text{CO}_2$  for at least 30 min to form  $\text{N}_2$  or  $\text{CO}_2$  saturated solution. The LSV and CV measurement in gas-saturated electrolyte was conducted in the potential range of 0.5 to -2.0 V vs.  $\text{Ag}/\text{Ag}^+$  at a sweep rate of 50 mV/s. The electrolysis experiments were conducted at 25 °C in a typical H-type cell that was similar to that used in previous works. It consisted of a cathode ( $\text{Cu}_2(\text{CuTCPP})$  electrode), an anode (platinum sheet auxiliary electrode), and an  $\text{Ag}/\text{Ag}^+$  reference electrode. In the experiments, the cathode and anode compartments were separated through a



Nafion 117 proton exchange membrane. 1 M H<sub>2</sub>O/CH<sub>3</sub>CN solutions with 0.5 M EMIMBF<sub>4</sub> as an electrolyte at ambient temperature, which is a commonly used electrolyte. H<sup>+</sup> can be transferred from anode compartment to cathode compartment through Nafion 117 proton exchange membrane, which is the proton source. CO<sub>2</sub> was bubbled through the catholyte (15 mL/min) for 30 min before electrolysis.<sup>6,7</sup>

## Section S5. Product Analysis

The gaseous product of electrochemical experiments was collected using a gas cylinder and analyzed by gas chromatography (GC, SRI, 8610C), which was equipped with HID and thermal conductivity detector (TCD) using helium (99.999%) as the carrier gas, with 1 ml every time. Meanwhile the gas was separated with MoleSieve 13X and Silica Gel inside of GC. The GC was equipped with a packed MolSieve 13X column and a packed Silica Gel column. Helium (99.999%) was used as the carrier gas. The column effluent (separated gas mixtures) was first passed through a TCD; it was then passed through a Helium Ionization Detector (HID). The liquid product was analyzed by <sup>1</sup>H NMR (Bruker Avance III 400 HD spectrometer) in DMSO-d<sub>6</sub> with TMS as an internal standard. Their faradic efficiency was calculated as follows:

$$\text{FE (\%)} = \frac{z n F}{Q} \times 100\%, \quad (\text{Equation 1})$$

Where z is the number of electrons required to form a molecule of product, F is the Faraday constant (96500 C/mol), and Q is the total charge. All Faradaic efficiencies were calculated without any normalization.

## Section S6. Calculation of Turnover Frequency

We integrated the anodic wave in the CV curve of Cu<sub>2</sub>(CuTCPP) under N<sub>2</sub> atmosphere (as depicted in Fig. S3), and then calculated the amount of quantity of electric charge: <sup>8,9</sup>

$$Q = \frac{S}{v}$$

Where Q is the integrated charge of the anodic wave, S is the oxidation peak area of the cyclic voltammetry curve and v is the sweep speed.

The amount of surface active Cu by assuming a two-electron redox process:

$$n = \frac{Q}{F}$$

where n is the amount of surface active Cu on the working electrode, Q is the integrated charge of the anodic wave, and F is the Faraday constant.

The total amount of Cu was calculated as follows:

$$n_{\text{tot}} = \frac{m_{\text{cat}} W_{\text{Cu}}}{M_{\text{Cu}}}$$

where n<sub>tot</sub> is the molar amount of Cu on the working electrode, m<sub>cat</sub> is the mass of the hybrid electrocatalyst loaded on the working electrode, w<sub>Cu</sub> is the weight fraction of Cu in the electrocatalyst determined, and M<sub>Cu</sub> is the atomic weight of Cu.

Then, the surface fraction of electrochemically active Cu sites was determined as follows:

$$f = \frac{n}{n_{\text{tot}}}$$

Turnover frequency (TOF) is defined as the mole of reduction product generated per electrocatalytic active site per unit time. The equation below:

$$\text{TOF} = \frac{(J_{\text{product}} / zF) / n_{\text{tot}}}{f} \times 3600$$

Where  $z$  is the number of electrons required to form a molecule of product,  $F$  is the Faraday constant (96500 C/mol),  $n_{\text{tot}}$  is the total amount of Cu on the working electrode and  $J_{\text{product}}$  is the recorded current of product.

## Section S7. Electrochemical CO<sub>2</sub> Reduction by Cu<sub>2</sub>(CuTCPP)

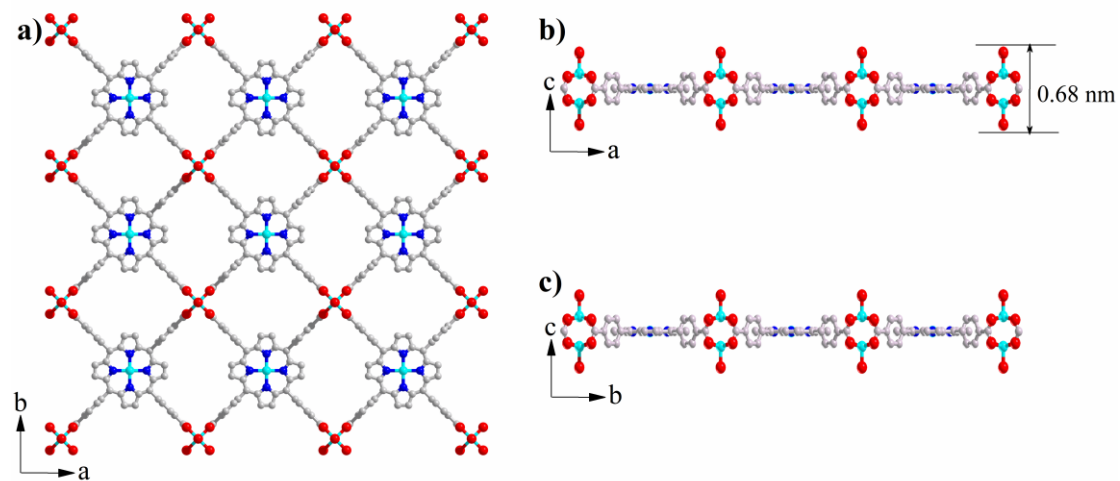

**Fig. S1.** Simulated crystal structure of Cu<sub>2</sub>(CuTCPP) (a, b and c). Red is O, blue is N, grey is C and cyan is Cu.

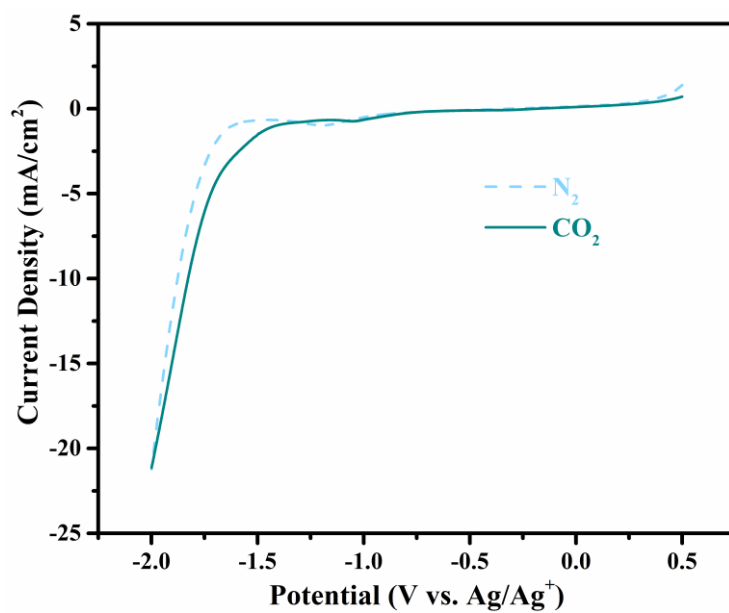

**Fig. S2.** Linear sweep voltammetry curves of Cu<sub>2</sub>(CuT CPP) in N<sub>2</sub> - or CO<sub>2</sub> -saturated CH<sub>3</sub>CN solutions with 1 M H<sub>2</sub>O and 0.5 M EMIMBF<sub>4</sub>.

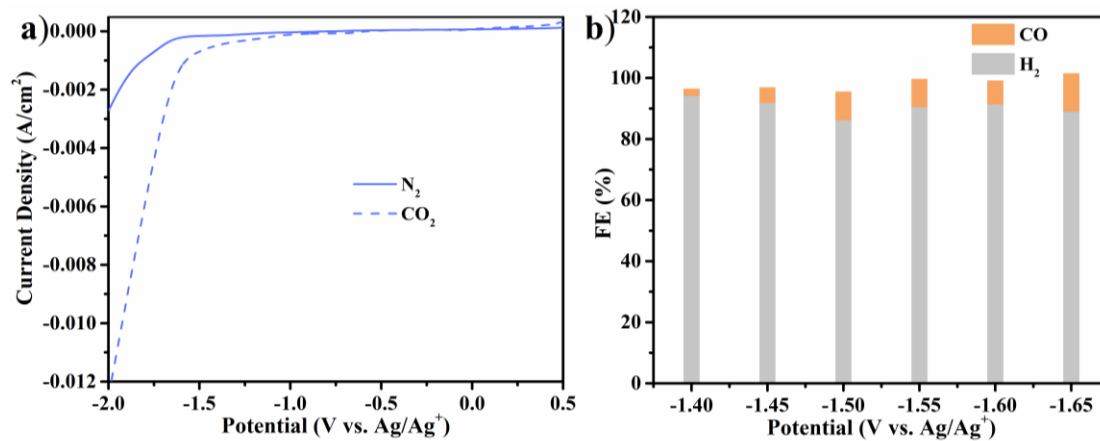

**Fig. S3.** Electrochemical performance of pure FTO electrode. (a) LSV in N<sub>2</sub> - or CO<sub>2</sub>-saturated CH<sub>3</sub>CN solutions with 1 M H<sub>2</sub>O and 0.5 M EMIMBF<sub>4</sub>; (b) Faradaic efficiency in CO<sub>2</sub>-saturated CH<sub>3</sub>CN solutions with 1 M H<sub>2</sub>O and 0.5 M EMIMBF<sub>4</sub>.

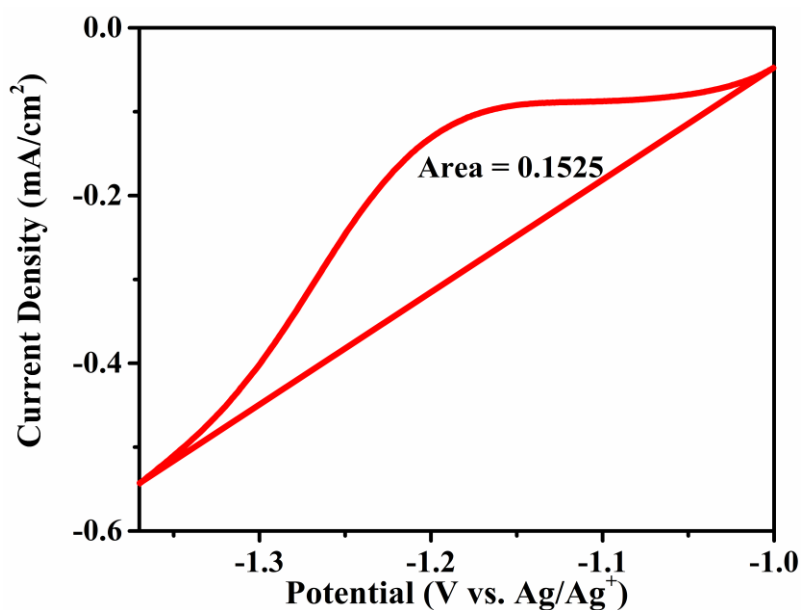

**Fig. S4.** Total charge integrated from the  $\text{Cu}^{2+}/\text{Cu}^0$  cathodic wave. Using CV value at 50 mV/s, which was in  $\text{N}_2$ -saturated  $\text{CH}_3\text{CN}$  solutions with 1 M  $\text{H}_2\text{O}$  and 0.5 M  $\text{EMIMBF}_4$ , we further estimated the percentage of surface Cu sites. The amount of surface active Cu is  $n = \frac{Q}{F} = [0.1525 \text{ (mA}\cdot\text{V/cm}^2) / 0.05 \text{ (V/s)}] / 96500 \text{ C/mol} = 3.16 \times 10^{-8} \text{ mol/cm}^2$ .



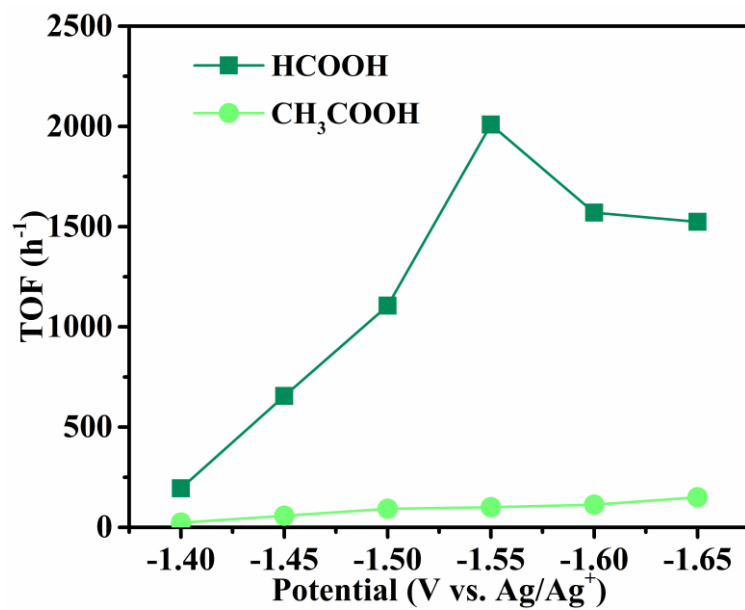

**Fig. S5.** TOF of formate and acetate by the pre-electrolyzed  $\text{Cu}_2(\text{CuTCPP})$  nanosheets at different working potentials

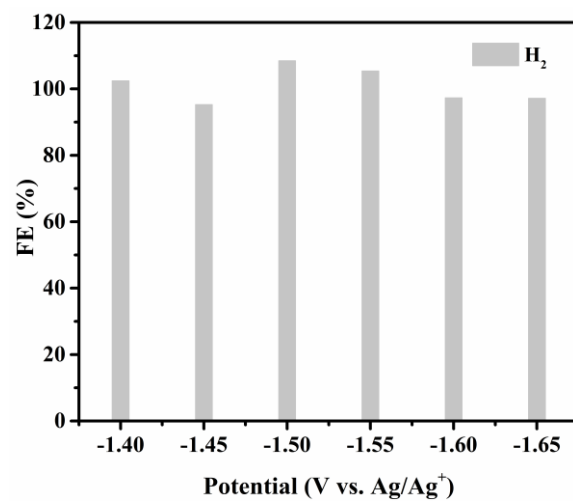

**Fig. S6.** Faradaic efficiencies of  $\text{Cu}_2(\text{CuTCCP})$  in  $\text{N}_2$ -saturated  $\text{CH}_3\text{CN}$  solutions with 1.0 M  $\text{H}_2\text{O}$  and 0.5 M  $\text{EMIMBF}_4$ .

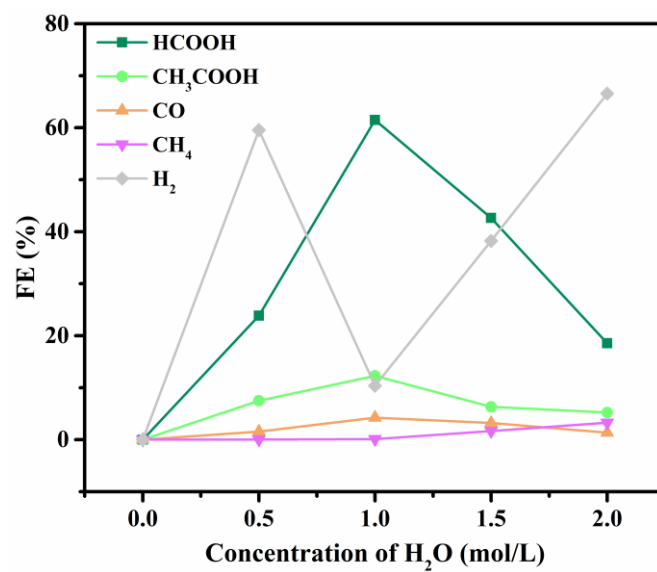

**Fig. S7.** The effect of H<sub>2</sub>O concentration on FE in CH<sub>3</sub>CN solutions with 0.5 M EMIMBF<sub>4</sub> at -1.55 V

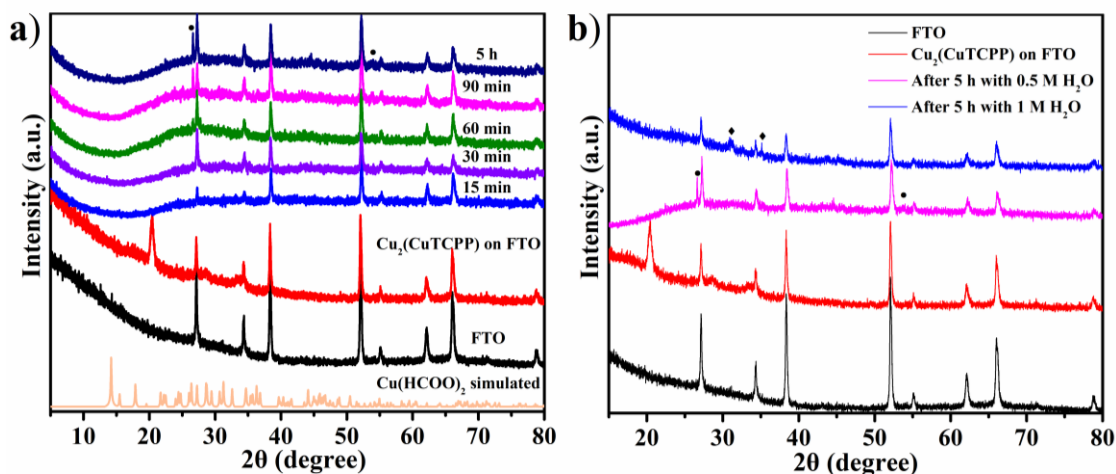

**Fig. S8.** XRD of  $\text{Cu}_2(\text{CuTCPP})$  on FTO after electrolysis at different time in  $\text{CO}_2$ -saturated  $\text{CH}_3\text{CN}$  solutions with 0.5 M  $\text{H}_2\text{O}$  and 0.5 M EMIMBF<sub>4</sub> (●  $\text{Cu}(\text{HCOO})_2$ ; ◆  $\text{Cu}_4\text{O}_3$ ). The XRD results are significantly different from those obtained under 1.0 M  $\text{H}_2\text{O}$  condition (See Fig. 4a). After 5 h, only the intermediate  $\text{Cu}(\text{HCOO})_2$  was generated under the condition with 0.5 M water, while with 1.0 M water, the generation of the intermediate  $\text{Cu}(\text{HCOO})_2$  only took 30 min and would keep transformed to  $\text{CuO}$ ,  $\text{Cu}_2\text{O}$  and  $\text{Cu}_4\text{O}_3$ . It seemed that the appropriate amount of water promoted the  $\text{Cu}_2(\text{CuTCPP})$  cathodized procedure.

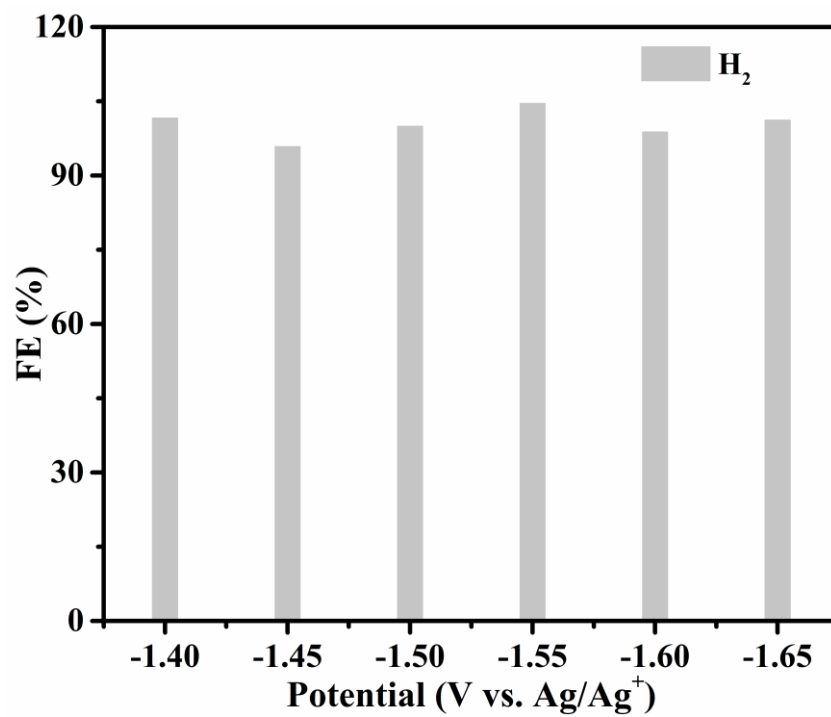

**Fig. S9.** Electrochemical performance of Cu<sub>2</sub>(CuTCPP) in CO -saturated CH<sub>3</sub>CN solutions with 1 M H<sub>2</sub>O and 0.5 M EMIMBF<sub>4</sub>.

## Section S8. Characterization of Other Cu Catalysts

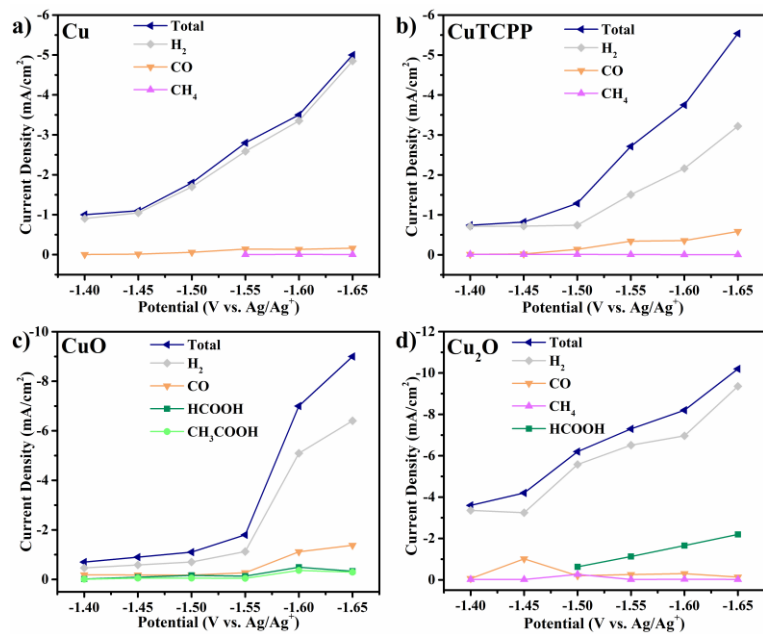

**Fig. S10.** Total and partial current densities of CO<sub>2</sub>RR products for (a) Cu; (b) CuTCPP; (c) CuO; (d) Cu<sub>2</sub>O catalysts.

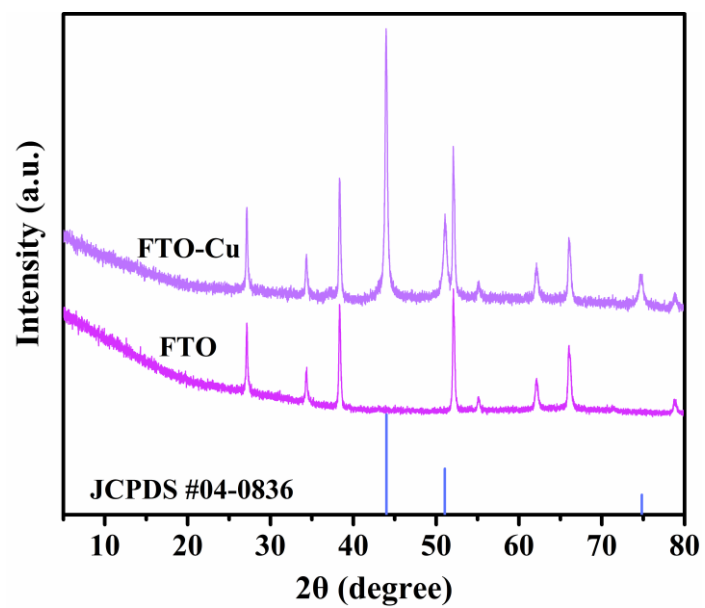

**Fig. S11.** XRD data of the as-synthesized Cu on FTO. All additional peaks match with JCPDS #04-0836.

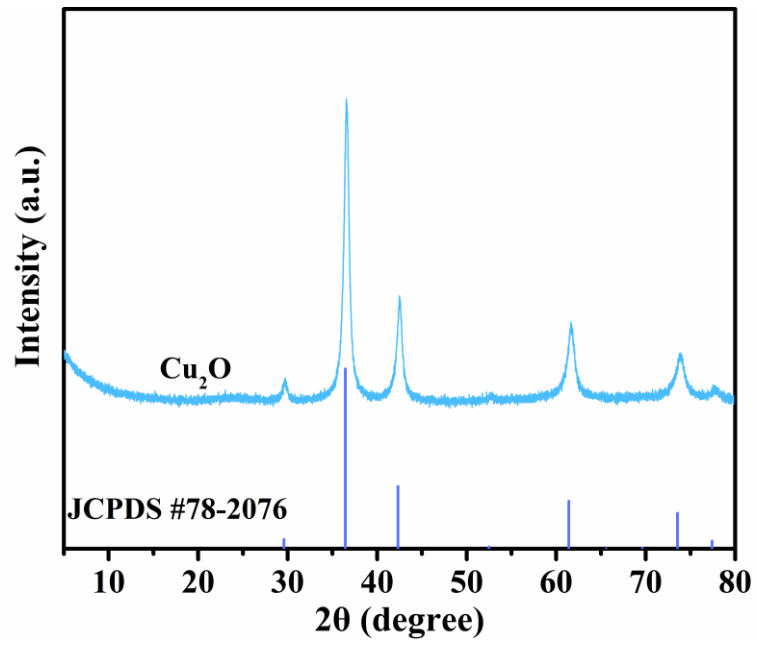

**Fig. S12.** XRD data of the as-synthesized Cu<sub>2</sub>O. All peaks match with JCPDS #78-2076.



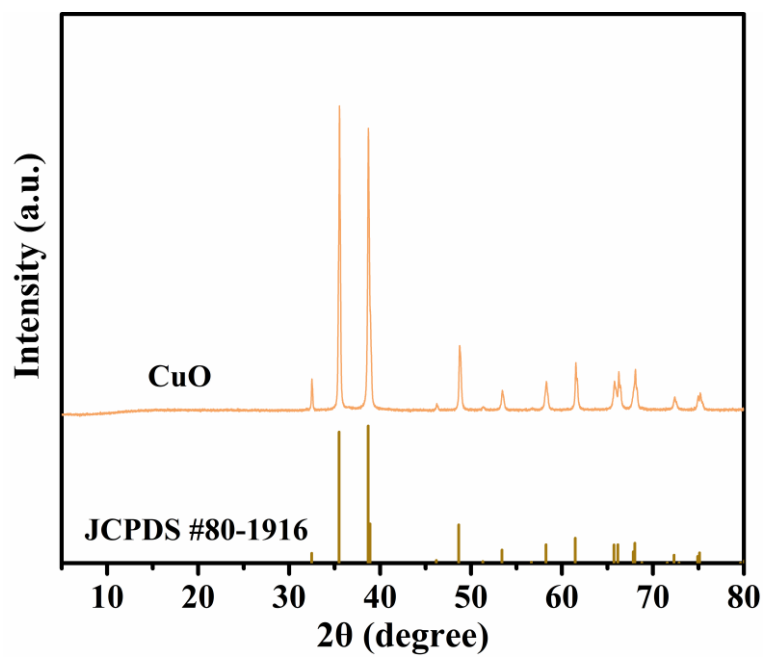

**Fig. S13.** XRD data of the as-synthesized CuO. All peaks match with JCPDS #80-1916.

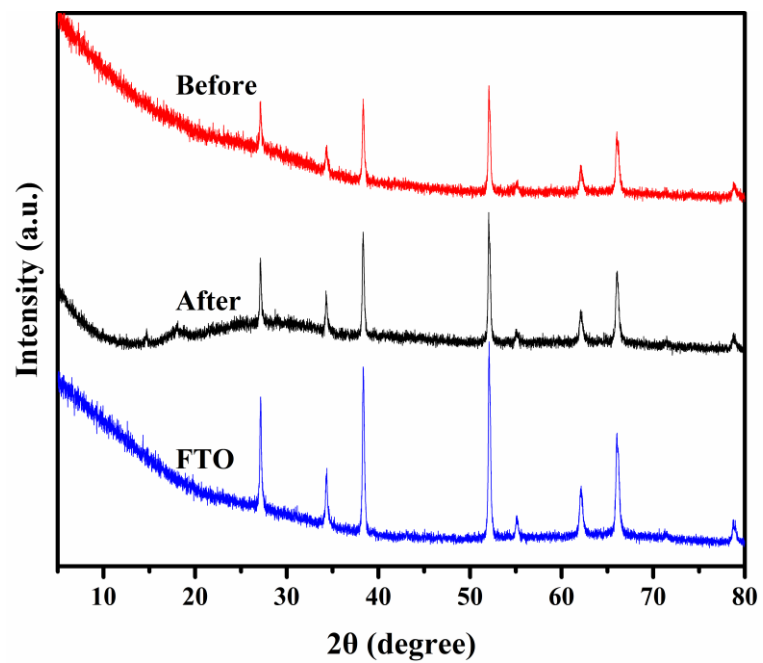

**Fig. S14.** XRD data of the as-synthesized CuTCPP before and after reaction.

## Section S9. Cathodized Reconstruction of Cu<sub>2</sub>(CuTCPP)

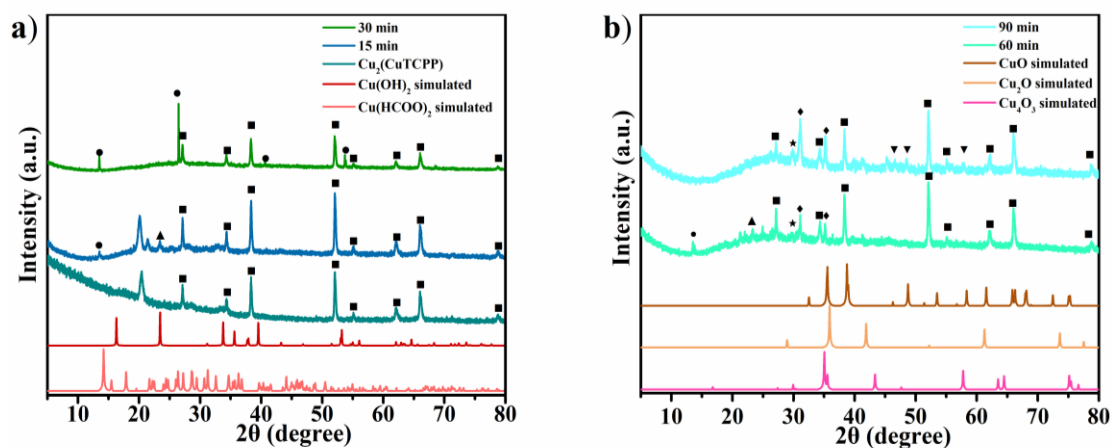

**Fig. S15.** XRD of Cu<sub>2</sub>(CuTCPP) catalyst on FTO with different reaction time in CO<sub>2</sub>-saturated CH<sub>3</sub>CN solutions with 1 M H<sub>2</sub>O and 0.5 M EMIMBF<sub>4</sub>. a) 15 min and 30 min; b) 60 min and 90 min. Marked peaks with possible products, intermediates and FTO substrate as ● Cu(HCOO)<sub>2</sub>; ◆ Cu<sub>4</sub>O<sub>3</sub>; ▲ Cu(OH)<sub>2</sub>; ▼ CuO; ★ Cu<sub>2</sub>O and ■ FTO.

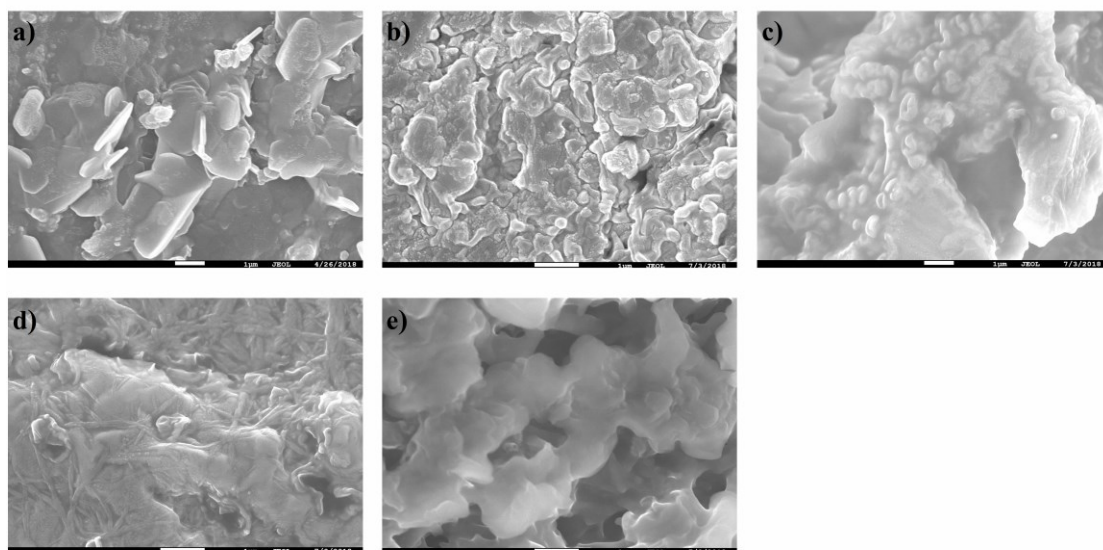

**Fig. S16.** SEM images of  $\text{Cu}_2(\text{CuTCCP})$  on FTO after electrolysis at  $-1.55$  V for different time (a) 0 min; (b) 15 min; (c) 30 min; (d) 60 min; (e) 90 min.

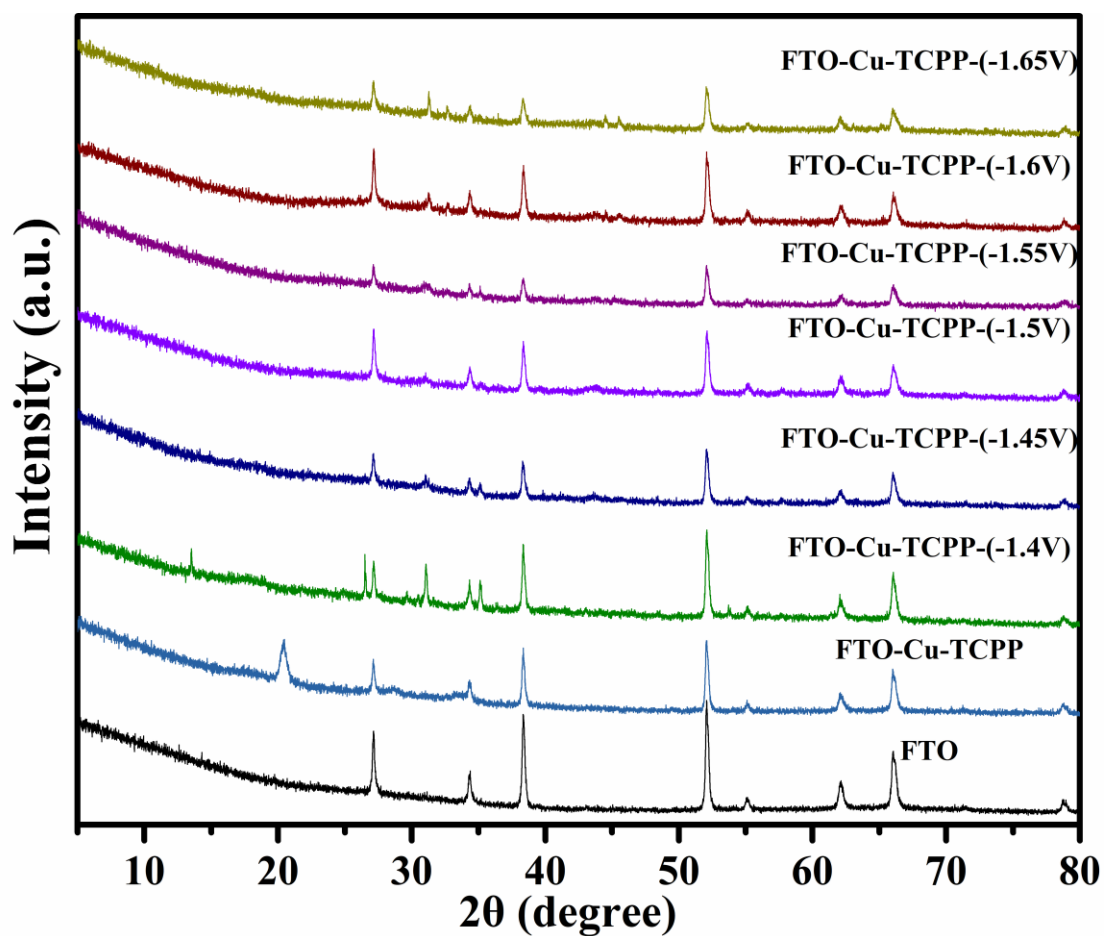

Fig. S17. XRD of  $\text{Cu}_2(\text{CuTCPP})$  on FTO after electrolysis at different voltage in  $\text{CO}_2$ -saturated  $\text{CH}_3\text{CN}$  solutions with 1 M  $\text{H}_2\text{O}$  and 0.5 M  $\text{EMIMBF}_4$

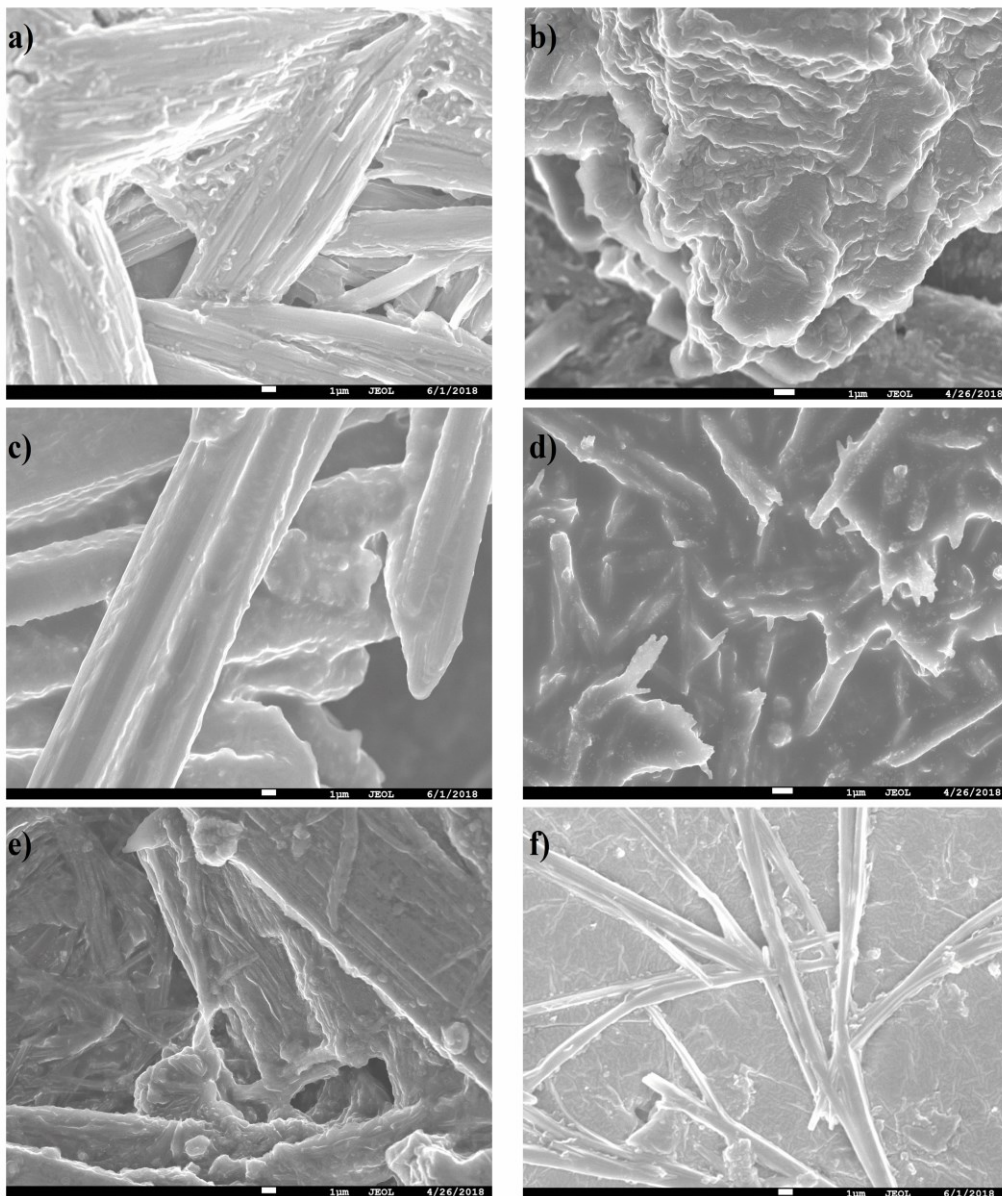

**Fig. S18.** SEM images of  $\text{Cu}_2(\text{CuTCCP})$  on FTO after electrolysis at different voltage for 5 h (a) -1.45 V; (b)-1.45 V; (c) -1.50 V; (d) -1.55 V; (e) -1.60 V; (f) -1.65 V.

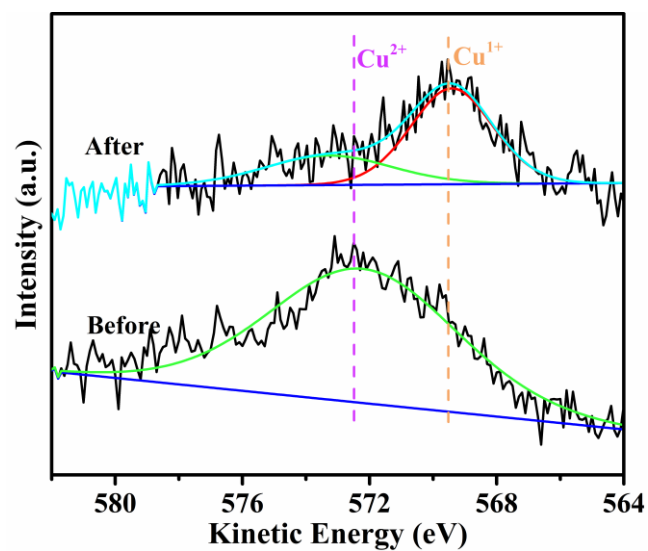

**Fig. S19.** The Auger spectra of as-synthesized  $\text{Cu}_2(\text{CuTCPP})$  before and after reaction. The two overlapped peaks at 569.5 eV and 572.5 eV were ascribed to the  $\text{Cu}^+$  and  $\text{Cu}^{2+}$ , respectively.<sup>10</sup>

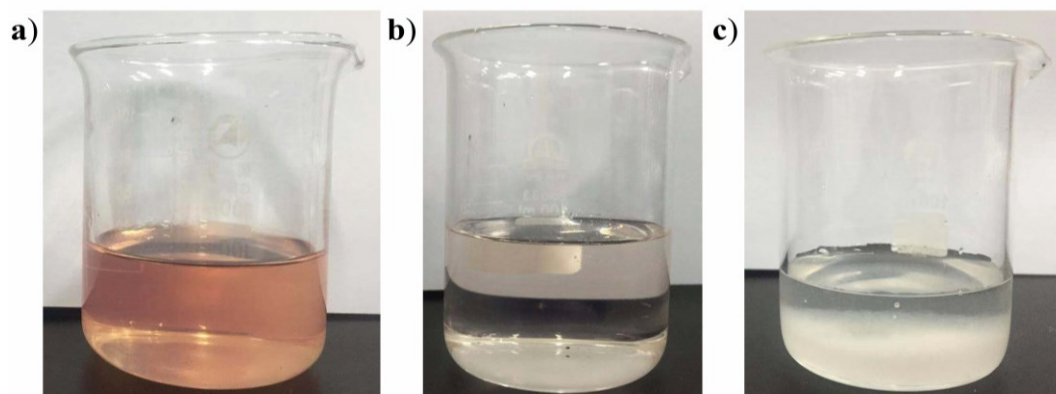

**Fig. S20.** (a) 40 mL pure electrolyte with 1 mg CuTCPP; (b) pure electrolyte with 0.1 mg CuTCPP; (c) the actual electrolyte after electrolysis with the precipitates of acetate and formate.



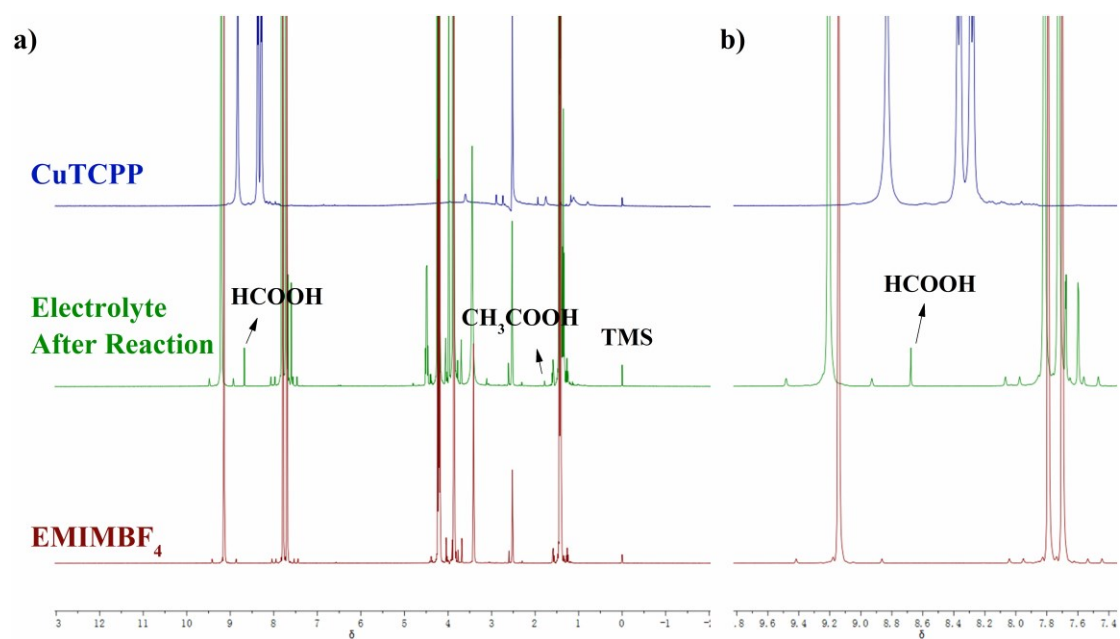

**Fig. S21.** (a) The NMR data and (b) enlarged spectra for CuTCPP ligand, EMIMBF<sub>4</sub> and electrolyte after reaction.

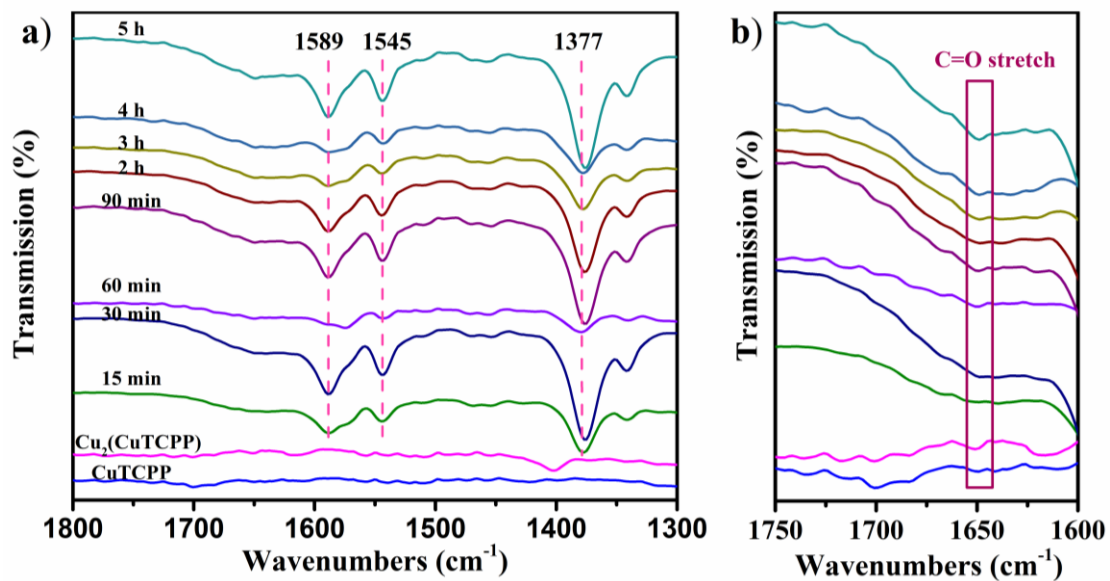

**Fig. S22.** The FT-IR spectra of catalysts before and after reduction at different time.

The peaks at 1589, 1545 and 1377 cm<sup>-1</sup> were the residual ionic liquid EMIMBF<sub>4</sub>.<sup>11</sup>

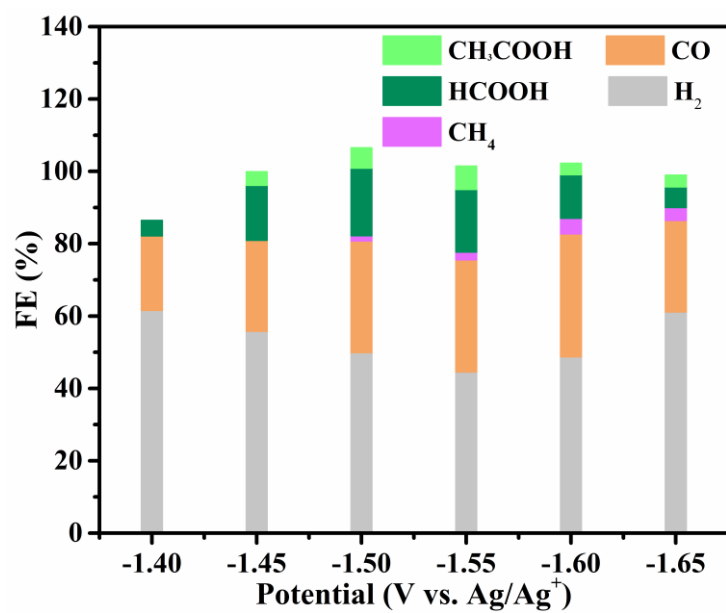

**Fig. S23.** Faradaic efficiencies of CuO/CuTCPP (molar ratio of 2:1) in CO<sub>2</sub>-saturated CH<sub>3</sub>CN solutions with 1 M H<sub>2</sub>O and 0.5 M EMIMBF<sub>4</sub> with different potentials.

## Section S10. Standard Curve

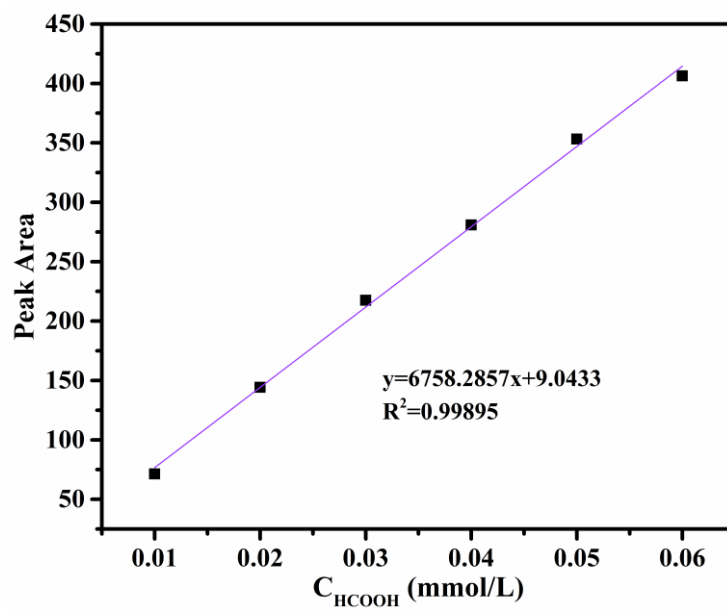

**Fig. S24.** Standard curve of HCOOH

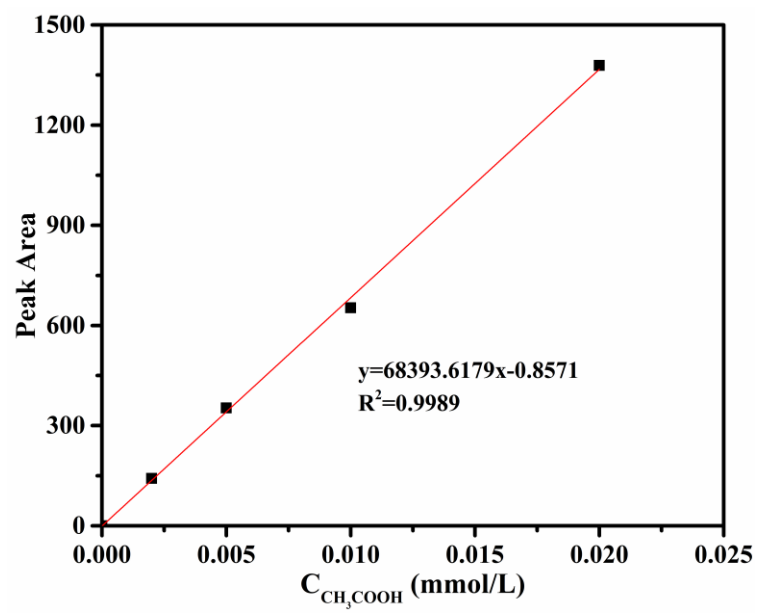

**Fig. S25.** Standard curve of  $\text{CH}_3\text{COOH}$

**Table S1.** Product yield of different catalysts

| Catalyst                               | H <sub>2</sub> ( $\mu\text{mol}$ ) | CO ( $\mu\text{mol}$ ) | CH <sub>4</sub> ( $\mu\text{mol}$ ) | HCOOH ( $\mu\text{mol}$ ) | CH <sub>3</sub> COOH ( $\mu\text{mol}$ ) |
|----------------------------------------|------------------------------------|------------------------|-------------------------------------|---------------------------|------------------------------------------|
| Cathodized<br>Cu <sub>2</sub> (CuTCPP) | 44.6                               | 55.2                   | 0.139                               | 312                       | 19.2                                     |
| Cu                                     | 215                                | 11.6                   | 0.0947                              | --                        | --                                       |
| Cu <sub>2</sub> O                      | 607                                | 21.4                   | 0.369                               | 105                       | --                                       |
| CuO                                    | 105                                | 25.2                   | --                                  | 12.3                      | 1.05                                     |
| CuTCPP                                 | 140                                | 42.1                   | 0.662                               | --                        | --                                       |

## References

1. G. Xu, K. Otsubo, T. Yamada, S. Sakaida and H. Kitagawa, *J. Am. Chem. Soc.*, 2013, **135**, 7438-7441.
2. G. Xu, T. Yamada, K. Otsubo, S. Sakaida and H. Kitagawa, *J. Am. Chem. Soc.*, 2012, **134**, 16524-16527.
3. D. Feng, Z.-Y. Gu, Y.-P. Chen, J. Park, Z. Wei, Y. Sun, M. Bosch, S. Yuan and H.-C. Zhou, *J. Am. Chem. Soc.*, 2014, **136**, 17714-17717.
4. R. Seakr, *T. Nonferr. Metal. Soc.*, 2017, **27**, 1423-1430.
5. G. Zhan and H. C. Zeng, *Adv. Funct. Mater.*, 2016, **26**, 3268-3281.
6. Y. Chen and M. W. Kanan, *J. Am. Chem. Soc.*, 2012, **134**, 1986-1989.
7. C. W. Li and M. W. Kanan, *J. Am. Chem. Soc.*, 2012, **134**, 7231-7234.
8. N. Han, Y. Wang, L. Ma, J. Wen, J. Li, H. Zheng, K. Nie, X. Wang, F. Zhao and Y. Li, *Chem*, 2017, **3**, 652-664.
9. N. Han, Y. Wang, H. Yang, J. Deng, J. Wu, Y. Li and Y. Li, *Nat. Commun.*, 2018, **9**, 1320.
10. F. Deng, N. Li, S. Tang, C. Liu, H. Yue and B. Liang, *Chem. Eng. J.*, 2018, **334**, 1943-1953.
11. H. Rabiee, A. Ghadimi and T. Mohammadi, *J. Membrane Sci.*, 2015, **476**, 286-302.
